# Supplementary material
Source: MDPI journal article supplement (https://www.mdpi.com/2673-4095/3/3/18)
Supplement: s1 [file s1]

# Optimizing Design Parameters of PLA 3D-Printed Scaffolds for Bone Defect Repair

Alexandrine Dussault, Audrey A. Pitaru, Michael H. Weber, Lisbet Haglund,  
Derek H. Rosenzweig and Isabelle Villemure

The following tables display the rigidity (MPa) and yield strength (MPa) for each scaffold models.

**Table S1.** Rigidity in MPa for each combination.

| Rigidity in MPa for models with SMALL and SQUARE pores |           |     |     |            |     |     |
|--------------------------------------------------------|-----------|-----|-----|------------|-----|-----|
| Pore orientation                                       | Crosswise |     |     | Lengthwise |     |     |
| Printing orientation                                   | 90°       | 0°  | FEA | 90°        | 0°  | FEA |
| Specimen #1                                            | 982       | 535 | 802 | 772        | 349 | 800 |
| Specimen #2                                            | 974       | 512 |     | 775        | 398 |     |
| Specimen #3                                            | 922       | 475 |     | 729        | 377 |     |
| Specimen #4                                            | 935       | 534 |     | 760        | 356 |     |
| Specimen #5                                            | 932       | 541 |     | 677        | 356 |     |
| Average                                                | 949       | 519 |     | 743        | 367 |     |
| Standard deviation                                     | 27        | 27  |     | 41         | 20  |     |

  

| Rigidity in MPa for models with MEDIUM and SQUARE pores |           |     |     |            |     |     |
|---------------------------------------------------------|-----------|-----|-----|------------|-----|-----|
| Pore orientation                                        | Crosswise |     |     | Lengthwise |     |     |
| Printing orientation                                    | 90°       | 0°  | FEA | 90°        | 0°  | FEA |
| Specimen #1                                             | 765       | 387 | 758 | 826        | 386 | 799 |
| Specimen #2                                             | 805       | 448 |     | 758        | 367 |     |
| Specimen #3                                             | 768       | 448 |     | 743        | 368 |     |
| Specimen #4                                             | 802       | 431 |     | 711        | 395 |     |
| Specimen #5                                             | 774       | 408 |     | 701        | 373 |     |
| Average                                                 | 783       | 424 |     | 748        | 378 |     |
| Standard deviation                                      | 19        | 26  |     | 50         | 12  |     |

  

| Rigidity in MPa for models with LARGE and SQUARE pores |           |     |     |            |     |     |
|--------------------------------------------------------|-----------|-----|-----|------------|-----|-----|
| Pore orientation                                       | Crosswise |     |     | Lengthwise |     |     |
| Printing orientation                                   | 90°       | 0°  | FEA | 90°        | 0°  | FEA |
| Specimen #1                                            | 617       | 533 | 725 | 797        | 303 | 782 |
| Specimen #2                                            | 650       | 389 |     | 811        | 292 |     |
| Specimen #3                                            | 688       | 540 |     | 728        | 540 |     |
| Specimen #4                                            | 652       | 555 |     | 720        | 505 |     |
| Specimen #5                                            | 689       | 381 |     | 711        | 606 |     |
| Average                                                | 659       | 480 |     | 753        | 449 |     |
| Standard deviation                                     | 30        | 87  |     | 47         | 143 |     |

| Rigidity in MPa for models with SMALL and CIRCULAR pores |           |     |     |            |     |     |
|----------------------------------------------------------|-----------|-----|-----|------------|-----|-----|
| Pore orientation                                         | Crosswise |     |     | Lengthwise |     |     |
| Printing orientation                                     | 90°       | 0°  | FEA | 90°        | 0°  | FEA |
| Specimen #1                                              | 950       | 508 | 797 | 788        | 365 | 808 |
| Specimen #2                                              | 974       | 526 |     | 730        | 354 |     |
| Specimen #3                                              | 1011      | 520 |     | 757        | 394 |     |
| Specimen #4                                              | 942       | 511 |     | 706        | 391 |     |
| Specimen #5                                              | 929       | 510 |     | 765        | 379 |     |
| Average                                                  | 961       | 515 |     | 749        | 376 |     |
| Standard deviation                                       | 32        | 7   |     | 32         | 17  |     |

| Rigidity in MPa for models with MEDIUM and CIRCULAR pores |           |     |     |            |     |     |
|-----------------------------------------------------------|-----------|-----|-----|------------|-----|-----|
| Pore orientation                                          | Crosswise |     |     | Lengthwise |     |     |
| Printing orientation                                      | 90°       | 0°  | FEA | 90°        | 0°  | FEA |
| Specimen #1                                               | 733       | 388 | 773 | 672        | 439 | 804 |
| Specimen #2                                               | 848       | 551 |     | 775        | 572 |     |
| Specimen #3                                               | 732       | 563 |     | 734        | 613 |     |
| Specimen #4                                               | 867       | 411 |     | 873        | 570 |     |
| Specimen #5                                               | 872       | 593 |     | 808        | 431 |     |
| Average                                                   | 810       | 501 |     | 772        | 525 |     |
| Standard deviation                                        | 71        | 94  |     | 76         | 84  |     |

| Rigidity in MPa for models with LARGE and CIRCULAR pores |           |     |     |            |     |     |
|----------------------------------------------------------|-----------|-----|-----|------------|-----|-----|
| Pore orientation                                         | Crosswise |     |     | Lengthwise |     |     |
| Printing orientation                                     | 90°       | 0°  | FEA | 90°        | 0°  | FEA |
| Specimen #1                                              | 696       | 491 | 726 | 794        | 361 | 786 |
| Specimen #2                                              | 610       | 580 |     | 625        | 504 |     |
| Specimen #3                                              | 678       | 584 |     | 654        | 446 |     |
| Specimen #4                                              | 677       | 340 |     | 615        | 646 |     |
| Specimen #5                                              | 610       | 324 |     | 556        | 371 |     |
| Average                                                  | 654       | 464 |     | 649        | 465 |     |
| Standard deviation                                       | 41        | 126 |     | 88         | 116 |     |

Since the material is defined as “linear” in the FE model, there is no yield strength value associated to the simulation.

**Table S2.** Yield strength (MPa) for each combination.

| Yield strength in MPa for models with SMALL and SQUARE pores |           |    |     |            |    |     |
|--------------------------------------------------------------|-----------|----|-----|------------|----|-----|
| Pore orientation                                             | Crosswise |    |     | Lengthwise |    |     |
| Printing orientation                                         | 90°       | 0° | FEA | 90°        | 0° | FEA |
| Specimen #1                                                  | 44        | 31 | N/A | 39         | 20 | N/A |
| Specimen #2                                                  | 44        | 30 |     | 40         | 20 |     |
| Specimen #3                                                  | 48        | 31 |     | 38         | 19 |     |
| Specimen #4                                                  | 44        | 30 |     | 41         | 21 |     |
| Specimen #5                                                  | 41        | 30 |     | 35         | 20 |     |
| Average                                                      | 44        | 30 |     | 39         | 20 |     |
| Standard deviation                                           | 2         | 0  |     | 2          | 1  |     |

| Yield strength in MPa for models with MEDIUM and SQUARE pores |           |    |     |            |    |     |
|---------------------------------------------------------------|-----------|----|-----|------------|----|-----|
| Pore orientation                                              | Crosswise |    |     | Lengthwise |    |     |
| Printing orientation                                          | 90°       | 0° | FEA | 90°        | 0° | FEA |
| Specimen #1                                                   | 35        | 24 | N/A | 33         | 23 | N/A |
| Specimen #2                                                   | 34        | 25 |     | 36         | 24 |     |
| Specimen #3                                                   | 33        | 26 |     | 35         | 23 |     |
| Specimen #4                                                   | 35        | 28 |     | 35         | 23 |     |
| Specimen #5                                                   | 33        | 25 |     | 34         | 24 |     |
| Average                                                       | 34        | 26 |     | 35         | 23 |     |
| Standard deviation                                            | 1         | 1  |     | 1          | 0  |     |

| Yield strength in MPa for models with LARGE and SQUARE pores |           |    |     |            |    |     |
|--------------------------------------------------------------|-----------|----|-----|------------|----|-----|
| Pore orientation                                             | Crosswise |    |     | Lengthwise |    |     |
| Printing orientation                                         | 90°       | 0° | FEA | 90°        | 0° | FEA |
| Specimen #1                                                  | 27        | 22 | N/A | 33         | 20 | N/A |
| Specimen #2                                                  | 28        | 20 |     | 33         | 20 |     |
| Specimen #3                                                  | 29        | 21 |     | 34         | 19 |     |
| Specimen #4                                                  | 26        | 20 |     | 31         | 19 |     |
| Specimen #5                                                  | 29        | 20 |     | 32         | 19 |     |
| Average                                                      | 27        | 21 |     | 33         | 19 |     |
| Standard deviation                                           | 1         | 1  |     | 1          | 1  |     |

| Yield strength in MPa for models with SMALL and CIRCULAR pores |           |    |     |            |    |     |
|----------------------------------------------------------------|-----------|----|-----|------------|----|-----|
| Pore orientation                                               | Crosswise |    |     | Lengthwise |    |     |
| Printing orientation                                           | 90°       | 0° | FEA | 90°        | 0° | FEA |
| Specimen #1                                                    | 45        | 31 | N/A | 37         | 19 | N/A |
| Specimen #2                                                    | 41        | 34 |     | 37         | 22 |     |
| Specimen #3                                                    | 43        | 31 |     | 36         | 22 |     |
| Specimen #4                                                    | 42        | 32 |     | 35         | 18 |     |
| Specimen #5                                                    | 41        | 31 |     | 36         | 24 |     |
| Average                                                        | 42        | 32 |     | 36         | 21 |     |
| Standard deviation                                             | 2         | 2  |     | 1          | 2  |     |

| Yield strength in MPa for models with MEDIUM and CIRCULAR pores |           |    |     |            |    |     |
|-----------------------------------------------------------------|-----------|----|-----|------------|----|-----|
| Pore orientation                                                | Crosswise |    |     | Lengthwise |    |     |
| Printing orientation                                            | 90°       | 0° | FEA | 90°        | 0° | FEA |
| Specimen #1                                                     | 31        | 23 | N/A | 35         | 20 | N/A |
| Specimen #2                                                     | 35        | 25 |     | 36         | 21 |     |
| Specimen #3                                                     | 32        | 25 |     | 36         | 24 |     |
| Specimen #4                                                     | 33        | 23 |     | 35         | 21 |     |
| Specimen #5                                                     | 34        | 25 |     | 34         | 22 |     |
| Average                                                         | 33        | 24 |     | 35         | 22 |     |
| Standard deviation                                              | 2         | 1  |     | 1          | 1  |     |

| Yield strength in MPa for models with LARGE and CIRCULAR pores |           |    |     |            |    |     |
|----------------------------------------------------------------|-----------|----|-----|------------|----|-----|
| Pore orientation                                               | Crosswise |    |     | Lengthwise |    |     |
| Printing orientation                                           | 90°       | 0° | FEA | 90°        | 0° | FEA |
| Specimen #1                                                    | 27        | 20 | N/A | 32         | 20 | N/A |
| Specimen #2                                                    | 25        | 20 |     | 29         | 15 |     |
| Specimen #3                                                    | 27        | 19 |     | 28         | 20 |     |
| Specimen #4                                                    | 25        | 19 |     | 26         | 20 |     |
| Specimen #5                                                    | 24        | 19 |     | 23         | 21 |     |
| Average                                                        | 26        | 19 |     | 28         | 19 |     |
| Standard deviation                                             | 1         | 1  |     | 3          | 2  |     |

The following table presents four tables with t-test results comparing the mean rigidities for all models. The significance is determined at  $p < 0.05$ . In the upper left corner, rigidities of crosswise and lengthwise models are compared for square pores only, for each pore size (small, medium, large) and each printing orientation ( $0^\circ$  or  $90^\circ$ ). In the upper right corner, the same comparison is made, this time for circular pore models. The lower left corner presents the t-test results comparing rigidities of circular and square pore shapes for crosswise models, for all pore sizes (small, medium, large) and all printing orientations ( $0^\circ$  or  $90^\circ$ ). The same is done on the lower right corner for lengthwise pore orientation.

**Table S3.** Statistical analyses comparing rigidities between models.

| Comparing rigidities: square pore shape |              |                         |              | Comparing rigidities: circular pore shape |              |                         |              |
|-----------------------------------------|--------------|-------------------------|--------------|-------------------------------------------|--------------|-------------------------|--------------|
| Pore size                               | Printing or. | Crosswise vs lengthwise | Significant? | Pore size                                 | Printing or. | Crosswise vs lengthwise | Significant? |
| small                                   | $0^\circ$    | 0,000                   | yes          | small                                     | $0^\circ$    | 0,000                   | yes          |
|                                         | $90^\circ$   | 0,000                   | yes          |                                           | $90^\circ$   | 0,000                   | yes          |
| medium                                  | $0^\circ$    | 0,013                   | yes          | medium                                    | $0^\circ$    | 0,693                   | no           |
|                                         | $90^\circ$   | 0,197                   | no           |                                           | $90^\circ$   | 0,338                   | no           |
| large                                   | $0^\circ$    | 0,697                   | no           | large                                     | $0^\circ$    | 0,911                   | no           |
|                                         | $90^\circ$   | 0,007                   | yes          |                                           | $90^\circ$   | 0,813                   | no           |

  

| Comparing rigidities: crosswise pore orientation |              |                    |              | Comparing rigidities: lengthwise pore orientation |              |                    |              |
|--------------------------------------------------|--------------|--------------------|--------------|---------------------------------------------------|--------------|--------------------|--------------|
| Pore size                                        | Printing or. | Circular vs square | Significant? | Pore size                                         | Printing or. | Circular vs square | Significant? |
| small                                            | $0^\circ$    | 0,731              | no           | small                                             | $0^\circ$    | 0,461              | no           |
|                                                  | $90^\circ$   | 0,538              | no           |                                                   | $90^\circ$   | 0,778              | no           |
| medium                                           | $0^\circ$    | 0,146              | no           | medium                                            | $0^\circ$    | 0,016              | yes          |
|                                                  | $90^\circ$   | 0,450              | no           |                                                   | $90^\circ$   | 0,563              | no           |
| large                                            | $0^\circ$    | 0,824              | no           | large                                             | $0^\circ$    | 0,849              | no           |
|                                                  | $90^\circ$   | 0,820              | no           |                                                   | $90^\circ$   | 0,057              | no           |

The following table presents four tables with t-test results comparing the mean yield strength for all models. It follows the same model as Table S3.

**Table S4.** Statistical analyses comparing yield strengths between models.

| Comparing yield strengths: square pore shape |              |                         |              |
|----------------------------------------------|--------------|-------------------------|--------------|
| Pore size                                    | Printing or. | Crosswise vs lengthwise | Significant? |
| small                                        | 0°           | 0,000                   | yes          |
|                                              | 90°          | 0,006                   | yes          |
| medium                                       | 0°           | 0,021                   | yes          |
|                                              | 90°          | 0,358                   | no           |
| large                                        | 0°           | 0,025                   | yes          |
|                                              | 90°          | 0,000                   | yes          |

| Comparing yield strengths: circular pore shape |              |                         |              |
|------------------------------------------------|--------------|-------------------------|--------------|
| Pore size                                      | Printing or. | Crosswise vs lengthwise | Significant? |
| small                                          | 0°           | 0,000                   | yes          |
|                                                | 90°          | 0,000                   | yes          |
| medium                                         | 0°           | 0,014                   | yes          |
|                                                | 90°          | 0,009                   | yes          |
| large                                          | 0°           | 0,955                   | no           |
|                                                | 90°          | 0,228                   | no           |

| Comparing yield strengths: crosswise pore orientation |              |                    |              |
|-------------------------------------------------------|--------------|--------------------|--------------|
| Pore size                                             | Printing or. | Circular vs square | Significant? |
| small                                                 | 0°           | 0,1434             | no           |
|                                                       | 90°          | 0,2042             | no           |
| medium                                                | 0°           | 0,1641             | no           |
|                                                       | 90°          | 0,0026             | yes          |
| large                                                 | 0°           | 0,0252             | yes          |
|                                                       | 90°          | 0,0544             | no           |

| Comparing yield strengths: lengthwise pore orientation |              |                    |              |
|--------------------------------------------------------|--------------|--------------------|--------------|
| Pore size                                              | Printing or. | Circular vs square | Significant? |
| small                                                  | 0°           | 0,0000             | yes          |
|                                                        | 90°          | 0,0637             | no           |
| medium                                                 | 0°           | 0,0493             | yes          |
|                                                        | 90°          | 0,4333             | no           |
| large                                                  | 0°           | 0,5782             | no           |
|                                                        | 90°          | 0,0240             | yes          |
